# Supplementary material for: TRIP13 impairs mitotic checkpoint surveillance and is associated with poor prognosis in multiple myeloma
Source: PubMed Central journal article supplement (PMC5432292; doi:10.18632/oncotarget.14957), 2017-02-01
Supplement: oncotarget-08-26718-s001.pdf [file oncotarget-08-26718-s001.pdf]

## TRIP13 impairs mitotic checkpoint surveillance and is associated with poor prognosis in multiple myeloma

### SUPPLEMENTARY FIGURES

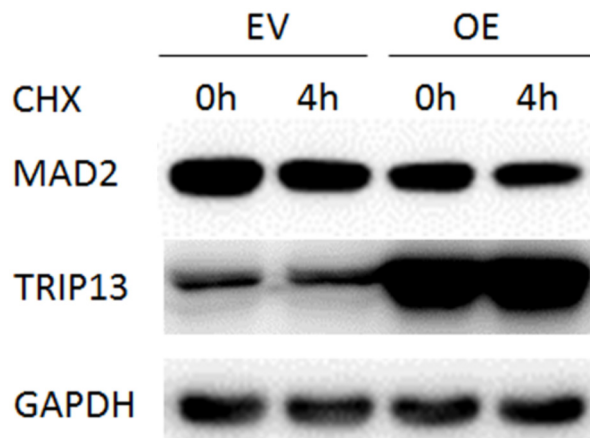

**Supplementary Figure 1:** TRIP 13 overexpressing (OE) ARP1cells and their counterparts transfected with empty vectors (EV) were treated with 20 mg/ml cycloheximide (CHX) for 4 h before harvest, and endogenous MAD2 protein levels were detected by western blotting.

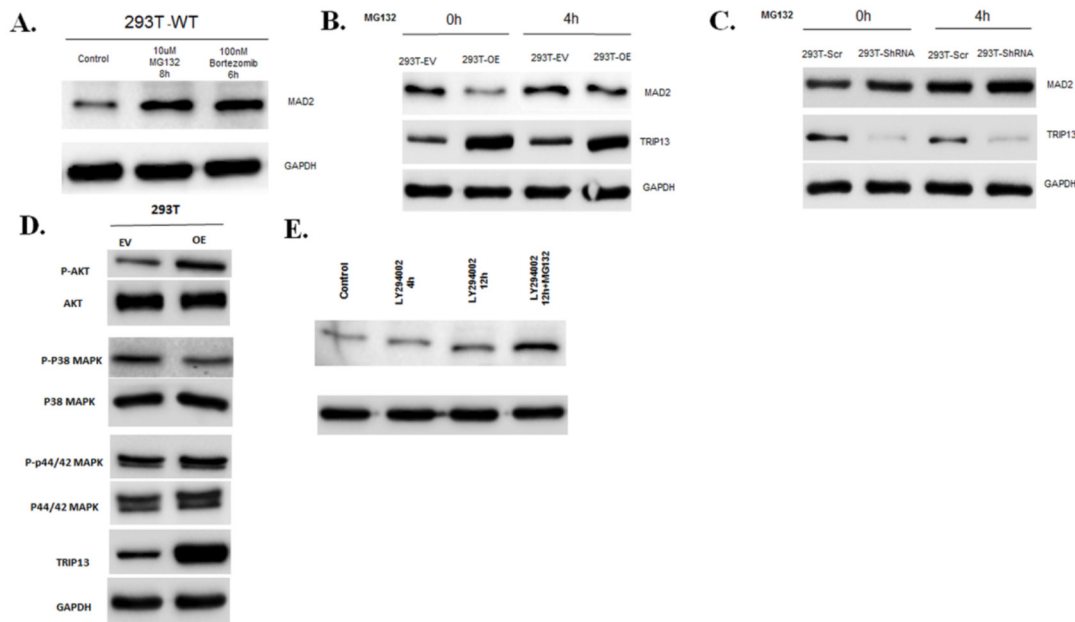

**Supplementary Figure 2:** A. Western blot of MAD2 in wild type HEK293T (293T-WT) cells treated with proteasome inhibitor MG132 and Bortezomib. B. Western blot of MAD2 in TRIP13 overexpressing HEK293T cells (293T-OE) and control cells transfected with empty vectors (293T-EV) treated with MG132. C. Western blot of MAD2 in TRIP13 knockdown HEK293T cells (293T-ShRNA) and the scrambled control (293T-Scr) treated with MG132. D. Western blot of signaling pathways including Akt, P38 MAPK, P44/42 MAPK in 293T-EV and 293T-OE. E. Western blot of MAD2 in 293T-OE treated with PI3K/Akt inhibitor LY294002 independently or in combination with MG132 for the last 4 hours.

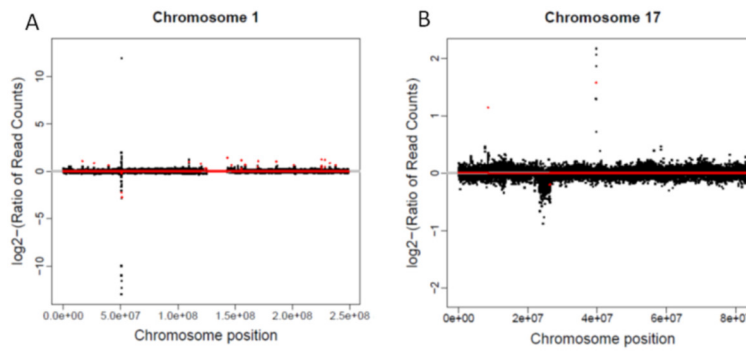

**Supplementary Figure 3: DNA copy number variation analysis about the MM cell line ARP1 overexpressing TRIP13 (ARP1-OE) and ARP1 cells transfected with empty vector (ARP1-EV).** Y-axis represents log<sub>2</sub>-transformed ratio of read counts (black points), and estimated log<sub>2</sub>-(fold change) of DNA copy numbers, for ARP1-OE relative to ARP1-EV. Red line indicates the average ratio of copy numbers across the chromosome. Chromosome 1 **A.** and 17 **B.** are shown here for demonstration. Note that ARP1-OE and ARP1-EV were cultured for only one generation after transfection and before submission for high-throughput DNA sequencing.
